# Supplementary material
Source: publisher site journal article supplement (https://www.dovepress.com/article/331853)
Supplement: Supplementary file 1 [file get_supplementary_file.php]

**Supplementary table S1** Correlations between HRCT parameters and pulmonary function indices in patients with COPD.

| **parameters** | **LAA% whole lung** | **RVC-856 to -950** | **MLDE/I** | **Mean WA%** |
| --- | --- | --- | --- | --- |
| FVC (%pred) | r=-0.512 p=**0.001** | r =-0.512 p=**0.001** | r =-0.532 p**＜0.001** | r =-0.127 p=0.461 |
| FEV1(%pred) | r =-0.726 p**＜0.001** | r =-0.590 p**＜0.001** | r =-0.625 p**＜0.001** | r =-0.212 p=0.214 |
| FEV1/FVC (%) | r =-0.723 **p＜0.001** | r =-0.573 p**＜0.001** | r =-0.504 p=**0.001** | r =0.084 p=0.621 |
| MEF75(%pred) | r =-0.749 **p＜0.001** | r =-0.593 p**＜0.001** | r =-0.632 p**＜0.001** | r =-0.124 p=0.471 |
| MEF50(%pred) | r =-0.712 **p＜0.001** | r =-0.516 p=**0.001** | r =-0.565 p**＜0.001** | r =-0.145 p=0.399 |
| MEF25(%pred) | r =-0.443 p=**0.004** | r =-0.345 p=**0.029** | r =-0.352 p=**0.025** | r =-0.136 p=0.435 |
| MMEF(%pred) | r =-0.670 p**＜0.001** | r =-0.512 p=**0.001** | r =-0.520 p=**0.001** | r =-0.190 p=0.274 |
| Fres (Hz) | r =0.555 p**＜0.001** | r =0.476 p=**0.002** | r =0.494 p=**0.001** | r =0.281 p=0.097 |
| R5(kpa·L-1·s-1) | r =0.350 p=**0.025** | r =0.307 p=0.051 | r =0.353 p=**0.024** | r =0.362 p=**0.030** |
| R20(kpa·L-1·s-1) | r =-0.052 p=0.745 | r =-0.019 p=0.906 | r =0.070 p=0.664 | r =0.313 p=0.063 |
| R5-R20(kpa·L-1·s-1) | r =0.542 p**＜0.001** | r =0.419 p=**0.006** | r =0.442 p=**0.004** | r =0.342 p=**0.041** |
| X5 (kpa·L-1·s-1) | r =-0.513 p=**0.001** | r =-0.413 p=**0.007** | r =-0.431 p=**0.005** | r =-0.303 p=0.073 |
| AX (kpa·L-1) | r =0.513 p=**0.001** | r =0.419 p=**0.006** | r =0.431 p=**0.005** | r =0.222 p=0.194 |

**Notes:** Bold indicates P-values less than 0.05.

**Abbreviations:** COPD, chronic obstructive pulmonary disease; r, correlation coefficient; LAA%, the % area of low attenuate= the percentage of low-attenuation areas lower than -950 Hounsfield units (HU) on inspiratory CT; WA%, wall area percent; RVC-856—950, relative volume change -856HU to -950HU; MLDE/I, the expiration to inspiration ratio of mean lung density; mean WA%, the average of WA% in 4th-6th generation of the right upper lobe apical segmental bronchus (RB1); FVC, forced vital capacity; FEV1, forced expiratory volume in 1 second; FEV1/FVC (%), forced expiratory volume in the first second/forced vital capacity; FEF75%, forced expiratory flow at 75% of the FVC; FEF50%, forced expiratory flow at 50% of the FVC; FEF25%, forced expiratory flow at 25% of the FVC; FEF25-75%, forced expiratory flow between 25%-75% of the FVC; R5, resistance at 5 Hz; R20, resistance at 20 Hz; R5-R20, difference between R5 and R20; X5, reactance at 5 Hz; Fres, resonant frequency; AX, area under the reactance curve.

**Supplementary table S2** Correlations between HRCT parameters and pulmonary function indices in patients with ACO.

| **parameters** | **LAA% whole lung** | **RVC-856 to -950** | **MLDE/I** | **Mean WA%** |
| --- | --- | --- | --- | --- |
| FVC (%pred) | r =-0.278 p=0.179 | r =-0.404 p=0.069 | r =-0.406 p=0.068 | r =-0.331 p=0.132 |
| FEV1(%pred) | r =-0.334 p=0.103 | r =-0.500 p=**0.021** | r =-0.540 p=**0.011** | r=-0.402 p=0.064 |
| FEV1/FVC (%) | r =-0.493 p=**0.012** | r =-0.481 p=**0.027** | r =-0.625 p=**0.002** | r =-0.403 p=0.063 |
| MEF75(%pred) | r =-0.466 p=**0.019** | r =-0.666 p=**0.001** | r =-0.709 p**＜0.001** | r =-0.461 p=**0.031** |
| MEF50(%pred) | r =-0.437 p=**0.029** | r =-0.482 p=**0.027** | r =-0.622 p=**0.003** | r =-0.347 p=0.113 |
| MEF25(%pred) | r =-0.022 p=0.921 | r =-0.189 p=0.438 | r =-0.326 p=0.173 | r =-0.461 p=**0.047** |
| MMEF(%pred) | r =-0.261 p=0.076 | r =-0.469 p=**0.032** | r =-0.605 p=**0.004** | r =-0.373 p=0.087 |
| Fres (Hz) | r =-0.093 p=0.658 | r =0.423 p=0.056 | r =0.340 p=0.132 | r =0.662 p=**0.001** |
| R5(kpa·L-1·s-1) | r =-0.378 p=0.063 | r =-0.209 p=0.362 | r =0.066 p=0.777 | r =0.617 p=**0.002** |
| R20(kpa·L-1·s-1) | r =-0.541 p=**0.005** | r =0.038 p=0.869 | r =0.016 p=0.944 | r =0.439 p=**0.041** |
| R5-R20(kpa·L-1·s-1) | r =-0.167 p=0.452 | r =0.076 p=0.742 | r =0.084 p=0.718 | r =0.348 p=0.112 |
| X5 (kpa·L-1·s-1) | r =-0.060 p=0.774 | r =-0.440 p=**0.046** | r =-0.515 p=**0.017** | r =-0.406 p=0.061 |
| AX (kpa·L-1) | r =-0.025 p=0.907 | r =0.514 p=**0.017** | r =0.505 p=**0.020** | r =0.437 p=**0.042** |

**Notes:** Bold indicates P-values less than 0.05.

**Abbreviations:** ACO, asthma-COPD overlap; r, correlation coefficient; LAA%, the % area of low attenuate= the percentage of low-attenuation areas lower than -950 Hounsfield units (HU) on inspiratory CT; WA%, wall area percent; RVC-856 to-950, relative volume change -856HU to -950HU; MLDE/I, the expiration to inspiration ratio of mean lung density; mean WA%, the average of WA% in 4th-6th generation of the right upper lobe apical segmental bronchus (RB1); FVC, forced vital capacity; FEV1, forced expiratory volume in 1 second; FEV1/FVC (%), forced expiratory volume in the first second/forced vital capacity; FEF75%, forced expiratory flow at 75% of the FVC; FEF50%, forced expiratory flow at 50% of the FVC; FEF25%, forced expiratory flow at 25% of the FVC; FEF25-75%, forced expiratory flow between 25%-75% of the FVC; R5, resistance at 5 Hz; R20, resistance at 20 Hz; R5-R20, difference between R5 and R20; X5, reactance at 5 Hz; Fres, resonant frequency; AX, area under the reactance curve.
